# Supplementary material
Source: Springer Nature journal article supplement (https://www.springermedizin.de/resource/supplementary/12936_2009_1155_MOESM1_ESM.pdf/9549988)
Supplement: MOESM1 [file 9549988]

Norm. Fluoro.

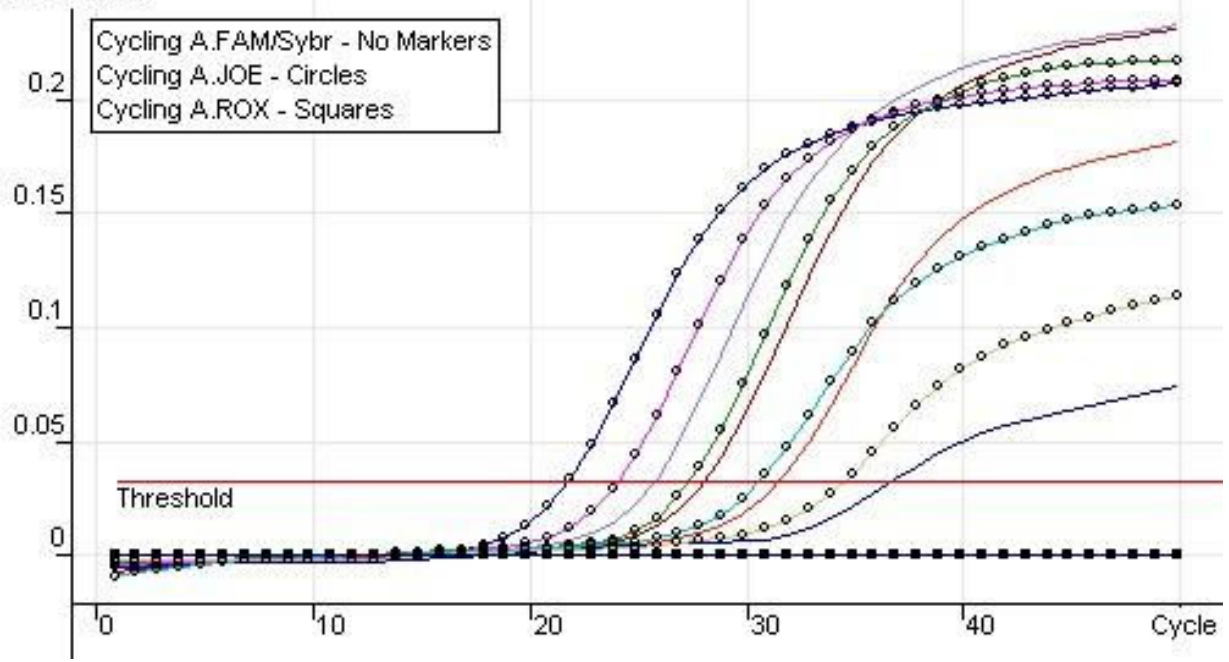

| Colour     | Control                              | Genotype | FAM   | JOE   | ROX  |
|------------|--------------------------------------|----------|-------|-------|------|
| Blue       | Dd2 3ng/ $\mu$ l                     | CVIET    | Grey  | Green | Grey |
| Magenta    | Dd2 3 X 10 <sup>-1</sup> ng/ $\mu$ l | CVIET    | Grey  | Green | Grey |
| Green      | Dd2 3 X 10 <sup>-2</sup> ng/ $\mu$ l | CVIET    | Grey  | Green | Grey |
| Cyan       | Dd2 3 X 10 <sup>-3</sup> ng/ $\mu$ l | CVIET    | Grey  | Green | Grey |
| Gold       | Dd2 3 X 10 <sup>-4</sup> ng/ $\mu$ l | CVIET    | Grey  | Green | Grey |
| Purple     | 3D7 3ng/ $\mu$ l                     | CVMNK    | Green | Grey  | Grey |
| Dark Red   | 3D7 3 X 10 <sup>-1</sup> ng/ $\mu$ l | CVMNK    | Green | Grey  | Grey |
| Red        | 3D7 3 X 10 <sup>-2</sup> ng/ $\mu$ l | CVMNK    | Green | Grey  | Grey |
| Dark Blue  | 3D7 3 X 10 <sup>-3</sup> ng/ $\mu$ l | CVMNK    | Green | Grey  | Grey |
| Light Blue | 3D7 3 X 10 <sup>-4</sup> ng/ $\mu$ l | -        | Grey  | Grey  | Grey |
| Dark Blue  | NTC                                  | -        | Grey  | Grey  | Grey |
